# Supplementary material for: Development of the gait outcomes assessment list for lower-limb differences (GOAL-LD) questionnaire: a child and parent reported outcome measure
Source: PubMed Central journal article supplement (PMC8097808; doi:10.1186/s12955-021-01775-z), 2021-05-05
Supplement: 12955_2021_1775_MOESM5_ESM.pdf [file 12955_2021_1775_MOESM5_ESM.pdf]

**Additional file 5**

**GOAL-LD Parent version**

**GOAL-LD**  
**Gait Outcomes Assessment List**  
**(for Lower-Limb Differences)**  
**Parent Version**

1. We are trying to learn more about your child and any goals you may have for treatment of their leg condition
2. Please read the instructions on each page carefully
3. Please answer all questions by circling the number and checking the box that fits best
4. You may choose to add more items that are important to you at the end of the questionnaire

**For example:**

| <b>A) Activities of Daily Living &amp; Independence</b>                                                                                                                                                                                                                                                                                                                                                                                                    |                                                                               |   |   |   |   |   |              | LEVEL of ASSISTANCE |                              |                    |            | IMPORTANCE of GOAL |                  |                |                     |  |
|------------------------------------------------------------------------------------------------------------------------------------------------------------------------------------------------------------------------------------------------------------------------------------------------------------------------------------------------------------------------------------------------------------------------------------------------------------|-------------------------------------------------------------------------------|---|---|---|---|---|--------------|---------------------|------------------------------|--------------------|------------|--------------------|------------------|----------------|---------------------|--|
| Consider how your child <b>usually</b> performs each of the following activities.<br>1) Rate how <b>easy or difficult</b> it was for your child to perform each of these activities over the past 4 weeks; <b>AND</b><br>2) Choose how much <b>assistance</b> your child required to help them perform these activities; <b>AND</b><br>3) Select <b>how important a goal</b> it is for you to have your child improve in each of the following activities. |                                                                               |   |   |   |   |   |              |                     |                              |                    |            |                    |                  |                |                     |  |
|                                                                                                                                                                                                                                                                                                                                                                                                                                                            | <i>Impossible</i> <span style="float: right;"><i>No problem at all</i></span> |   |   |   |   |   | <b>TOTAL</b> | <b>MODERATE</b>     | <b>MINIMAL OR SUPERVISED</b> | <b>INDEPENDENT</b> | Not a goal | Not very important | Fairly important | Very important | Extremely important |  |
| <b>3. Balancing objects while walking (e.g., a cup of hot chocolate, a tray of food)</b>                                                                                                                                                                                                                                                                                                                                                                   | 0                                                                             | 1 | 2 | 3 | 4 | 5 | 6            | 0                   | 1                            | 2                  | 3          | <b>X</b>           |                  |                |                     |  |

In the above example, usual performance for 'balancing objects while walking' is rated **4 out of 6**; requires **no assistance**; and improving this is a **fairly important** goal.

**Your Name:** \_\_\_\_\_

**Relationship to the Patient:** \_\_\_\_\_

**Date of Completion (dd/mm/yy):** \_\_\_\_\_

| A) Gait Function & Mobility                                                                                                                                                                                                                                                                                                                                                                                                                                            |                                                                                                                                                                                                                                                                                                                                                             |   |   |   |   |   |   | WALKING AID REQUIRED |        |                       |                                                 |             | IMPORTANCE of GOAL |                    |                  |                |                     |
|------------------------------------------------------------------------------------------------------------------------------------------------------------------------------------------------------------------------------------------------------------------------------------------------------------------------------------------------------------------------------------------------------------------------------------------------------------------------|-------------------------------------------------------------------------------------------------------------------------------------------------------------------------------------------------------------------------------------------------------------------------------------------------------------------------------------------------------------|---|---|---|---|---|---|----------------------|--------|-----------------------|-------------------------------------------------|-------------|--------------------|--------------------|------------------|----------------|---------------------|
| Consider how your child <u>usually</u> performs each of the following activities.<br>1) Rate how <b>easy or difficult</b> it is for your child to perform each of these activities in the <b>past 4 weeks</b> ; <b>AND</b><br>2) Choose how much <b>assistance</b> your child required to help them perform these activities; <b>AND</b><br>3) Select <b>how important a goal</b> it is for you to have your child <b>improve</b> in each of the following activities. |                                                                                                                                                                                                                                                                                                                                                             |   |   |   |   |   |   | WHEELCHAIR           | WALKER | TWO CANES OR CRUTCHES | ONE CANE / CRUTCH/HAND SUPPORT/ RAILING OR WALL | INDEPENDENT | Not a goal         | Not very important | Fairly important | Very important | Extremely important |
| During the past 4 weeks:                                                                                                                                                                                                                                                                                                                                                                                                                                               | <div style="display: flex; justify-content: space-between; align-items: center;"> <span><i>Impossible</i></span> <span style="flex-grow: 1; border-bottom: 1px solid black; position: relative;"> <span style="position: absolute; top: -5px; left: 0; right: 0; border-top: 1px solid black;"></span> </span> <span><i>No problem at all</i></span> </div> |   |   |   |   |   |   |                      |        |                       |                                                 |             |                    |                    |                  |                |                     |
| 1. Carrying heavy objects (e.g., grocery bags, several school books) while walking                                                                                                                                                                                                                                                                                                                                                                                     | 0                                                                                                                                                                                                                                                                                                                                                           | 1 | 2 | 3 | 4 | 5 | 6 | 0                    | 1      | 2                     | 3                                               | 4           |                    |                    |                  |                |                     |
| 2. Balancing objects (e.g., a cup of hot chocolate, a tray of food) while walking                                                                                                                                                                                                                                                                                                                                                                                      | 0                                                                                                                                                                                                                                                                                                                                                           | 1 | 2 | 3 | 4 | 5 | 6 | 0                    | 1      | 2                     | 3                                               | 4           |                    |                    |                  |                |                     |
| 3. Walking for more than 250 meters/820 feet (around 2 blocks or 2 football fields)                                                                                                                                                                                                                                                                                                                                                                                    | 0                                                                                                                                                                                                                                                                                                                                                           | 1 | 2 | 3 | 4 | 5 | 6 | 0                    | 1      | 2                     | 3                                               | 4           |                    |                    |                  |                |                     |
| 4. Getting around in crowded spaces (e.g., school, a concert or the shopping mall)                                                                                                                                                                                                                                                                                                                                                                                     | 0                                                                                                                                                                                                                                                                                                                                                           | 1 | 2 | 3 | 4 | 5 | 6 | 0                    | 1      | 2                     | 3                                               | 4           |                    |                    |                  |                |                     |
| 5. Standing for a long time (e.g., lineups, queues)                                                                                                                                                                                                                                                                                                                                                                                                                    | 0                                                                                                                                                                                                                                                                                                                                                           | 1 | 2 | 3 | 4 | 5 | 6 | 0                    | 1      | 2                     | 3                                               | 4           |                    |                    |                  |                |                     |

| A) Gait Function & Mobility- continued                                                                                                                                                                                                                                                                                                                                                                                                                                 |            |   |   |   |   |   |                   | WALKING AID REQUIRED |        |                       |                                                 |             | IMPORTANCE of GOAL |                    |                  |                |                     |
|------------------------------------------------------------------------------------------------------------------------------------------------------------------------------------------------------------------------------------------------------------------------------------------------------------------------------------------------------------------------------------------------------------------------------------------------------------------------|------------|---|---|---|---|---|-------------------|----------------------|--------|-----------------------|-------------------------------------------------|-------------|--------------------|--------------------|------------------|----------------|---------------------|
| Consider how your child <b>usually</b> performs each of the following activities.<br>1) Rate how <b>easy or difficult</b> it was for your child to perform each of these activities in the <b>past 4 weeks</b> ; <b>AND</b><br>2) Choose how much <b>assistance</b> your child required to help them perform these activities; <b>AND</b><br>3) Select <b>how important a goal</b> it is for you to have your child <b>improve</b> in each of the following activities |            |   |   |   |   |   |                   | WHEELCHAIR           | WALKER | TWO CANES OR CRUTCHES | ONE CANE / CRUTCH/HAND SUPPORT/ RAILING OR WALL | INDEPENDENT | Not a goal         | Not very important | Fairly important | Very important | Extremely important |
| During the past 4 weeks:                                                                                                                                                                                                                                                                                                                                                                                                                                               | Impossible |   |   |   |   |   | No problem at all |                      |        |                       |                                                 |             |                    |                    |                  |                |                     |
| 6. Keeping up with their friends while walking outdoors                                                                                                                                                                                                                                                                                                                                                                                                                | 0          | 1 | 2 | 3 | 4 | 5 | 6                 | 0                    | 1      | 2                     | 3                                               | 4           |                    |                    |                  |                |                     |
| 7. Stepping around or avoiding obstacles                                                                                                                                                                                                                                                                                                                                                                                                                               | 0          | 1 | 2 | 3 | 4 | 5 | 6                 | 0                    | 1      | 2                     | 3                                               | 4           |                    |                    |                  |                |                     |
| 8. Going up and down stairs                                                                                                                                                                                                                                                                                                                                                                                                                                            | 0          | 1 | 2 | 3 | 4 | 5 | 6                 | 0                    | 1      | 2                     | 3                                               | 4           |                    |                    |                  |                |                     |
| 9. Going up and down ramps                                                                                                                                                                                                                                                                                                                                                                                                                                             | 0          | 1 | 2 | 3 | 4 | 5 | 6                 | 0                    | 1      | 2                     | 3                                               | 4           |                    |                    |                  |                |                     |
| 10. Walking on uneven ground (rough, rocky, sandy)                                                                                                                                                                                                                                                                                                                                                                                                                     | 0          | 1 | 2 | 3 | 4 | 5 | 6                 | 0                    | 1      | 2                     | 3                                               | 4           |                    |                    |                  |                |                     |
| 11. Walking on wet, slippery or icy surfaces                                                                                                                                                                                                                                                                                                                                                                                                                           | 0          | 1 | 2 | 3 | 4 | 5 | 6                 | 0                    | 1      | 2                     | 3                                               | 4           |                    |                    |                  |                |                     |

| <b>B) Pain / Discomfort / Fatigue</b>                                                                                                                                                                                                                                                                                                                                                   |   |   |   |   |   |   | <b>INTENSITY</b> |                 |             |             | <b>IMPORTANCE of GOAL</b> |                           |                         |                       |                            |
|-----------------------------------------------------------------------------------------------------------------------------------------------------------------------------------------------------------------------------------------------------------------------------------------------------------------------------------------------------------------------------------------|---|---|---|---|---|---|------------------|-----------------|-------------|-------------|---------------------------|---------------------------|-------------------------|-----------------------|----------------------------|
| Consider each of the following items.<br>1) Rate how <b>often</b> your child experienced pain or discomfort or tiredness in the <b>past 4 weeks</b> ; <b>AND</b><br>2) Choose how <b>severe</b> the pain or discomfort was; <b>AND</b><br>3) Select <b>how important a goal</b> it is for you to have your child <b>reduce pain or discomfort or tiredness</b> in each of the following |   |   |   |   |   |   | <b>SEVERE</b>    | <b>MODERATE</b> | <b>MILD</b> | <b>NONE</b> | <b>Not a goal</b>         | <b>Not very important</b> | <b>Fairly important</b> | <b>Very important</b> | <b>Extremely important</b> |
|                                                                                                                                                                                                                                                                                                                                                                                         |   |   |   |   |   |   |                  |                 |             |             |                           |                           |                         |                       |                            |
| 12. Pain or discomfort in the feet or ankles                                                                                                                                                                                                                                                                                                                                            | 0 | 1 | 2 | 3 | 4 | 5 | 0                | 1               | 2           | 3           |                           |                           |                         |                       |                            |
| 13. Pain or discomfort in the lower legs (shin, calf)                                                                                                                                                                                                                                                                                                                                   | 0 | 1 | 2 | 3 | 4 | 5 | 0                | 1               | 2           | 3           |                           |                           |                         |                       |                            |
| 14. Pain or discomfort in the knees                                                                                                                                                                                                                                                                                                                                                     | 0 | 1 | 2 | 3 | 4 | 5 | 0                | 1               | 2           | 3           |                           |                           |                         |                       |                            |
| 15. Pain or discomfort in the thighs or hips                                                                                                                                                                                                                                                                                                                                            | 0 | 1 | 2 | 3 | 4 | 5 | 0                | 1               | 2           | 3           |                           |                           |                         |                       |                            |
| 16. Pain or discomfort in the back                                                                                                                                                                                                                                                                                                                                                      | 0 | 1 | 2 | 3 | 4 | 5 | 0                | 1               | 2           | 3           |                           |                           |                         |                       |                            |
| 17. Feeling easily tired during physical activities that my child enjoys (e.g., swimming, running, or other sports)                                                                                                                                                                                                                                                                     | 0 | 1 | 2 | 3 | 4 | 5 | 0                | 1               | 2           | 3           |                           |                           |                         |                       |                            |
| Other pain:<br>_____                                                                                                                                                                                                                                                                                                                                                                    | 0 | 1 | 2 | 3 | 4 | 5 | 0                | 1               | 2           | 3           |                           |                           |                         |                       |                            |

| C) Physical Activities, Games & Recreation                                                                                                                                                                                                                                                                                                     |                                        |   |   |   |   |   |                                        |                          | IMPORTANCE of GOAL |                    |                  |                |                     |
|------------------------------------------------------------------------------------------------------------------------------------------------------------------------------------------------------------------------------------------------------------------------------------------------------------------------------------------------|----------------------------------------|---|---|---|---|---|----------------------------------------|--------------------------|--------------------|--------------------|------------------|----------------|---------------------|
| Consider how your child <b>usually</b> performs each of the following activities.<br>1) Rate how <b>easy or difficult</b> it was for your child to perform each of these activities in the <b>past year</b> ; AND<br>2) Select <b>how important a goal</b> it is for you to have your child <b>improve</b> in each of the following activities |                                        |   |   |   |   |   |                                        |                          | Not a goal         | Not very important | Fairly important | Very important | Extremely important |
| During the past year:                                                                                                                                                                                                                                                                                                                          | <i>Impossible</i><br>No problem at all |   |   |   |   |   | My child has never tried this activity |                          |                    |                    |                  |                |                     |
| 18. Running fast                                                                                                                                                                                                                                                                                                                               | 0                                      | 1 | 2 | 3 | 4 | 5 | 6                                      | <input type="checkbox"/> |                    |                    |                  |                |                     |
| 19. Participating in gliding sports (e.g., skating, rollerblading, skiing, skate/snowboarding)                                                                                                                                                                                                                                                 | 0                                      | 1 | 2 | 3 | 4 | 5 | 6                                      | <input type="checkbox"/> |                    |                    |                  |                |                     |
| 20. Riding a bicycle                                                                                                                                                                                                                                                                                                                           | 0                                      | 1 | 2 | 3 | 4 | 5 | 6                                      | <input type="checkbox"/> |                    |                    |                  |                |                     |
| 21. Swimming                                                                                                                                                                                                                                                                                                                                   | 0                                      | 1 | 2 | 3 | 4 | 5 | 6                                      | <input type="checkbox"/> |                    |                    |                  |                |                     |
| 22. Participating in sports that require running (e.g., soccer, baseball, football, track)                                                                                                                                                                                                                                                     | 0                                      | 1 | 2 | 3 | 4 | 5 | 6                                      | <input type="checkbox"/> |                    |                    |                  |                |                     |
| 23. Participating in sports that require jumping (e.g., basketball, volleyball, trampoline)                                                                                                                                                                                                                                                    | 0                                      | 1 | 2 | 3 | 4 | 5 | 6                                      | <input type="checkbox"/> |                    |                    |                  |                |                     |
| 24. Participating in sports that require balance (gymnastics, dance or martial arts)                                                                                                                                                                                                                                                           | 0                                      | 1 | 2 | 3 | 4 | 5 | 6                                      | <input type="checkbox"/> |                    |                    |                  |                |                     |
| 25. Climbing (ladder, playground equipment, wall climbing)                                                                                                                                                                                                                                                                                     | 0                                      | 1 | 2 | 3 | 4 | 5 | 6                                      | <input type="checkbox"/> |                    |                    |                  |                |                     |
| Other recreational or sporting activity:<br>_____                                                                                                                                                                                                                                                                                              | 0                                      | 1 | 2 | 3 | 4 | 5 | 6                                      | <input type="checkbox"/> |                    |                    |                  |                |                     |

| <b>D) Gait Appearance</b>                                                                                                                                                                                                                                         |   |   |   |   |   |   |   | <b>IMPORTANCE of GOAL</b> |                    |                  |                |                     |
|-------------------------------------------------------------------------------------------------------------------------------------------------------------------------------------------------------------------------------------------------------------------|---|---|---|---|---|---|---|---------------------------|--------------------|------------------|----------------|---------------------|
| Consider each of the following items.<br>1) Rate how <b>much of a problem</b> your child experienced with each of the following in the <b>past 4 weeks</b> ; <b>AND</b><br>2) Select <b>how important a goal</b> it is for you to have your child improve in each |   |   |   |   |   |   |   | Not a goal                | Not very important | Fairly important | Very important | Extremely important |
|                                                                                                                                                                                                                                                                   |   |   |   |   |   |   |   |                           |                    |                  |                |                     |
| 26. Walking with his/her feet flat on the ground                                                                                                                                                                                                                  | 0 | 1 | 2 | 3 | 4 | 5 | 6 |                           |                    |                  |                |                     |
| 27. Walking taller or more upright (less crouched or bent at the knees)                                                                                                                                                                                           | 0 | 1 | 2 | 3 | 4 | 5 | 6 |                           |                    |                  |                |                     |
| 28. Walking with his/her feet pointing straight ahead                                                                                                                                                                                                             | 0 | 1 | 2 | 3 | 4 | 5 | 6 |                           |                    |                  |                |                     |
| 29. Walking without a limp                                                                                                                                                                                                                                        | 0 | 1 | 2 | 3 | 4 | 5 | 6 |                           |                    |                  |                |                     |
| 30. Walking without tripping and falling                                                                                                                                                                                                                          | 0 | 1 | 2 | 3 | 4 | 5 | 6 |                           |                    |                  |                |                     |
| Other aspect of my child's walking:                                                                                                                                                                                                                               | 0 | 1 | 2 | 3 | 4 | 5 | 6 |                           |                    |                  |                |                     |

| <b>E) Use of Braces and Assistive Devices</b>                                                                                                                                                                                                    |                                               |   |   |   |   | <b>IMPORTANCE of GOAL</b> |                    |                  |                |                     |                          |                                                    |
|--------------------------------------------------------------------------------------------------------------------------------------------------------------------------------------------------------------------------------------------------|-----------------------------------------------|---|---|---|---|---------------------------|--------------------|------------------|----------------|---------------------|--------------------------|----------------------------------------------------|
| Consider each of the following items.<br>1) Rate how you <b>feel</b> about your child using each of the following; <b>AND</b><br>2) Select <b>how important a goal</b> it is for you to have your child reduce or eliminate use of these devices |                                               |   |   |   |   | Not a goal                | Not very important | Fairly important | Very important | Extremely important |                          |                                                    |
| <b>During the past 4 weeks:</b>                                                                                                                                                                                                                  | <i>Very Unhappy</i>  -----  <i>Very Happy</i> |   |   |   |   |                           |                    |                  |                |                     |                          |                                                    |
| <b>31. A shoe lift</b>                                                                                                                                                                                                                           | 0                                             | 1 | 2 | 3 | 4 |                           |                    |                  |                |                     | <input type="checkbox"/> | My child has not been prescribed a shoe lift       |
|                                                                                                                                                                                                                                                  |                                               |   |   |   |   |                           |                    |                  |                |                     | <input type="checkbox"/> | My child chooses not to wear their shoe lift       |
| <b>32. A brace (e.g., AFO)</b>                                                                                                                                                                                                                   | 0                                             | 1 | 2 | 3 | 4 |                           |                    |                  |                |                     | <input type="checkbox"/> | My child has not been prescribed any type of brace |
|                                                                                                                                                                                                                                                  |                                               |   |   |   |   |                           |                    |                  |                |                     | <input type="checkbox"/> | My child chooses not to wear their brace           |
| <b>33. A prosthesis (artificial leg)</b>                                                                                                                                                                                                         |                                               |   |   |   |   |                           |                    |                  |                |                     | <input type="checkbox"/> | My child has not been prescribed a prosthesis      |
|                                                                                                                                                                                                                                                  |                                               |   |   |   |   |                           |                    |                  |                |                     | <input type="checkbox"/> | My child chooses not to wear their prosthesis      |
| <b>34. A walking aide (e.g., walker, stick, cane, crutches)</b>                                                                                                                                                                                  | 0                                             | 1 | 2 | 3 | 4 |                           |                    |                  |                |                     | <input type="checkbox"/> | My child does not use any walking aides            |
| <b>35. A wheelchair</b>                                                                                                                                                                                                                          | 0                                             | 1 | 2 | 3 | 4 |                           |                    |                  |                |                     | <input type="checkbox"/> | My child does not use a wheelchair                 |
| <b>36. Other assistive devices (e.g., built-up bicycle pedal)</b>                                                                                                                                                                                | 0                                             | 1 | 2 | 3 | 4 |                           |                    |                  |                |                     | <input type="checkbox"/> | My child does not use any other assistive devices  |

| <b>F) Body Image &amp; Self-Esteem</b>                                                                                                                                                                                                           |                     |   |   |   |                   | <b>IMPORTANCE of GOAL</b> |                    |                  |                |                     |
|--------------------------------------------------------------------------------------------------------------------------------------------------------------------------------------------------------------------------------------------------|---------------------|---|---|---|-------------------|---------------------------|--------------------|------------------|----------------|---------------------|
| Consider each of the following items.<br>1) Rate how you <b>feel</b> about your child using each of the following; <b>AND</b><br>2) Select <b>how important a goal</b> it is for you to have your child reduce or eliminate use of these devices |                     |   |   |   |                   | Not a goal                | Not very important | Fairly important | Very important | Extremely important |
| <b>During the past 4 weeks:</b>                                                                                                                                                                                                                  | <i>Very Unhappy</i> |   |   |   | <i>Very Happy</i> |                           |                    |                  |                |                     |
|                                                                                                                                                                                                                                                  | 0                   | 1 | 2 | 3 | 4                 |                           |                    |                  |                |                     |
| <b>37. The shape and position of my child's legs</b>                                                                                                                                                                                             | 0                   | 1 | 2 | 3 | 4                 |                           |                    |                  |                |                     |
| <b>38. The shape and position of my child's feet</b>                                                                                                                                                                                             | 0                   | 1 | 2 | 3 | 4                 |                           |                    |                  |                |                     |
| <b>39. The symmetry of my child's legs (in length and size)</b>                                                                                                                                                                                  | 0                   | 1 | 2 | 3 | 4                 |                           |                    |                  |                |                     |
| <b>40. Wearing his/her choice of footwear (e.g., shoes, boots, sandals)</b>                                                                                                                                                                      | 0                   | 1 | 2 | 3 | 4                 |                           |                    |                  |                |                     |
| <b>41. Wearing his/her choice of clothing (e.g., shorts, skirts, bathing suits)</b>                                                                                                                                                              | 0                   | 1 | 2 | 3 | 4                 |                           |                    |                  |                |                     |
| <b>42. The appearance of how my child gets around compared with others</b>                                                                                                                                                                       | 0                   | 1 | 2 | 3 | 4                 |                           |                    |                  |                |                     |
| <b>43. The way others feel about how my child gets around</b>                                                                                                                                                                                    | 0                   | 1 | 2 | 3 | 4                 |                           |                    |                  |                |                     |
| <b>44. How my child is treated by others</b>                                                                                                                                                                                                     | 0                   | 1 | 2 | 3 | 4                 |                           |                    |                  |                |                     |



| Other Goals                                                                                                                                                                                         | IMPORTANCE of GOAL |                    |                  |                |                     |
|-----------------------------------------------------------------------------------------------------------------------------------------------------------------------------------------------------|--------------------|--------------------|------------------|----------------|---------------------|
| <p>If there are any other goals (long or short term) that we have missed, please list them below <b>AND</b> select <b>how important a goal</b> it is to have your child <b>improve</b> in each.</p> |                    |                    |                  |                |                     |
| Other Goals:                                                                                                                                                                                        | Not a goal         | Not very important | Fairly important | Very important | Extremely important |
| 1.                                                                                                                                                                                                  |                    |                    |                  |                |                     |
| 2.                                                                                                                                                                                                  |                    |                    |                  |                |                     |
| 3.                                                                                                                                                                                                  |                    |                    |                  |                |                     |
| 4.                                                                                                                                                                                                  |                    |                    |                  |                |                     |
| 5.                                                                                                                                                                                                  |                    |                    |                  |                |                     |
| <b>Comments &amp; Suggestions</b>                                                                                                                                                                   |                    |                    |                  |                |                     |
|                                                                                                                                                                                                     |                    |                    |                  |                |                     |

**Thank You**
